# Supplementary material for: Accounting for heading date gene effects allows detection of small-effect QTL associated with resistance to Septoria nodorum blotch in wheat
Source: PubMed Central journal article supplement (PMC9119491; doi:10.1371/journal.pone.0268546), 2022-05-19
Supplement: pone.0268546.s002.pdf [file pone.0268546.s002.pdf]

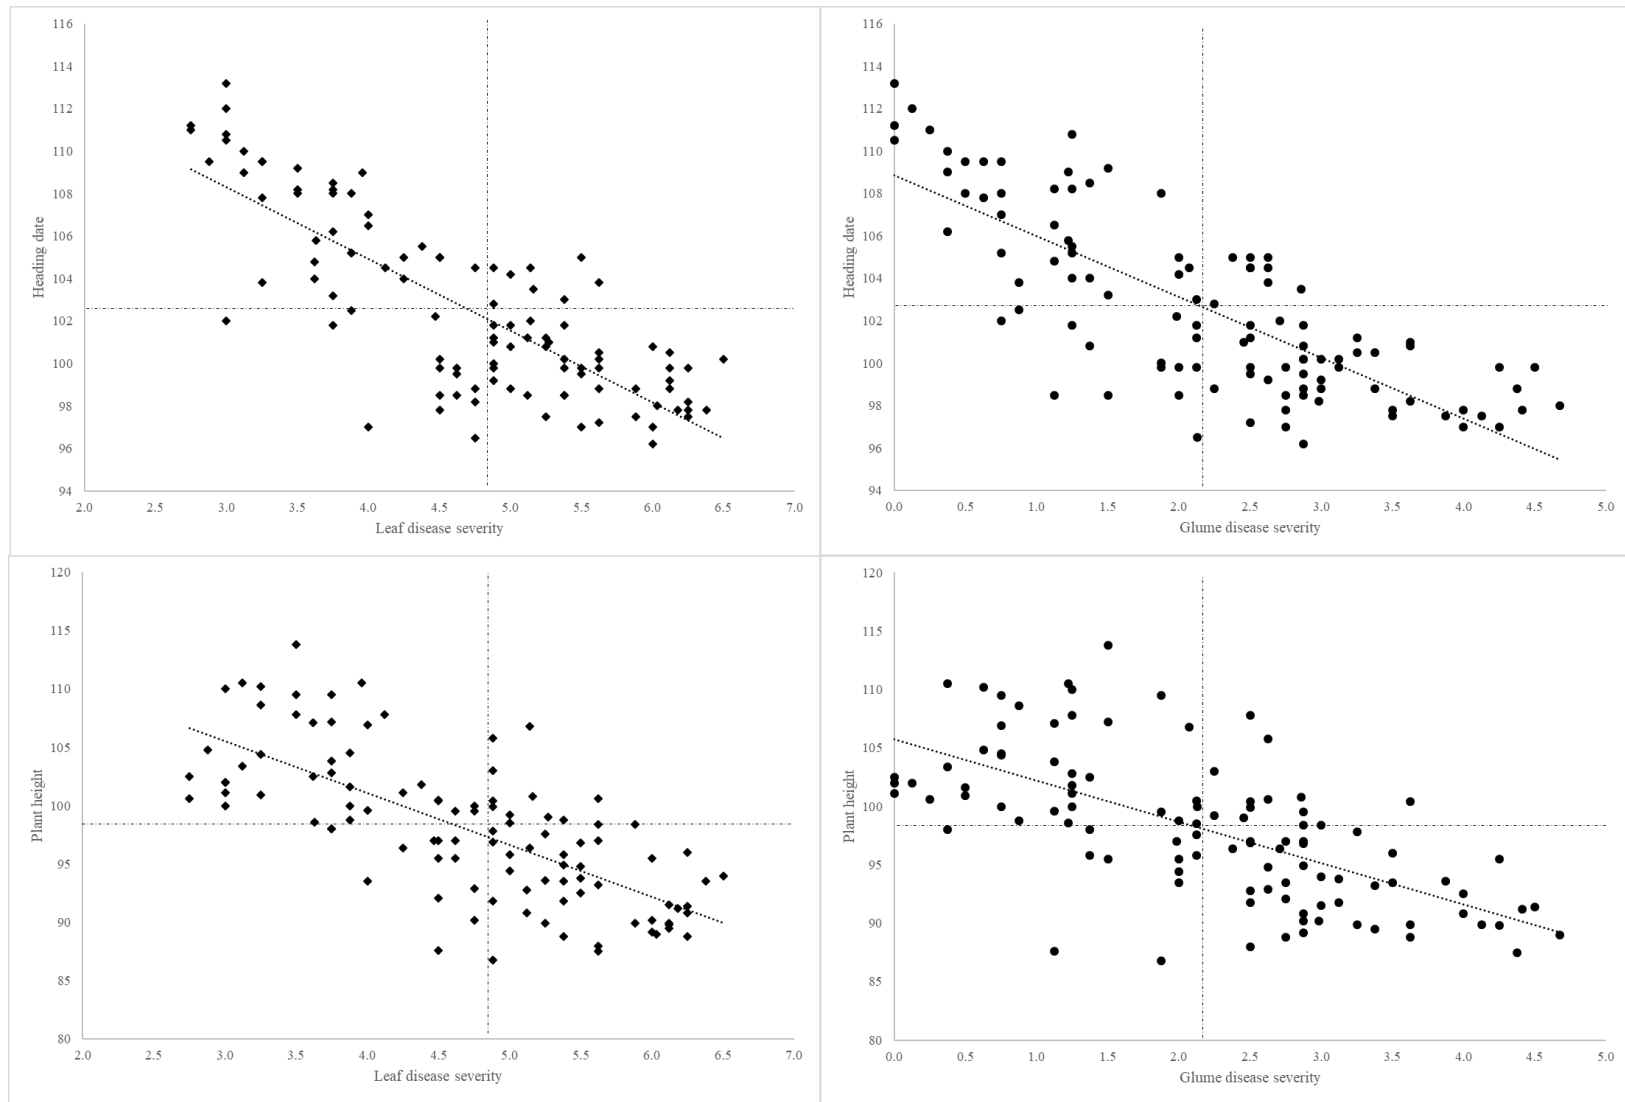

**S2 Fig. Scatter plots of combined-year plant height and heading date vs. combined-year leaf and glume disease severity in the GADH population.** Dashed vertical and horizontal lines indicate the GADH population mean for each trait.
